# Supplementary material
Source: publisher figshare collection journal article supplement (https://tandf.figshare.com/articles/dataset/_/10277657)
Supplement: Supplementary file 1 [file 2]

# Web-based Supplementary Materials for "Bayesian model selection in order-restricted two-way ANOVA mixed models"

Yonggang Ji, Haifang Shi

*School of Science, Civil Aviation University of China, Tianjin, China*

*ygji@cauc.edu.cn; hfshi@cauc.edu.cn*

---

## 1. Sensitivity of the SSVS in real data analysis

As George and McCulloch(1993) have proved that there are only small fluctuations to the mixture variance parameters  $c\phi_i$  in SSVS by simulations, we first fixed  $\phi_i = 1$  following the suggestion of Walli and Wagner (2011), and simply considered four priors with different values of  $c$  to check the sensitivity of SSVS method in real data analysis. The posterior probabilities of all the possible models and the posterior estimates for the parameters are listed in Table 1 and Table 2, respectively. The results of Table 1 show that SSVS with  $c = 1/10, 1/100$ , NMIG, Kuo&Mallick tend to choose the same model, whereas SSVS with  $c = 1/1000, 1/10000$  and Shang tend to choose the same model. SSVS method does not select the same model under different values of  $c$ , but SSVS always choose the same top two models. It can be observed from Table 2 that there is no significant difference in the performance of the posterior estimates with different values of  $c$ . All mentioned above indicate that the results of model selection are generally not sensitive to the parameters  $c\phi_i$  in SSVS. Moreover, We further did a more careful check to the top two models selected by SSVS under different values of

*c.* The difference between the posterior probabilities of the top two models are list in 3. We noticed that Shang and SSVS have similar performance. The small gap between the values of the posterior probabilities of  $H_1$  and  $H_F$ , suggests that these two models can be quite difficult to distinguish using SSVS and Shang, though the effect of  $\delta_1$  is significant in  $H_F$ . This interesting observation motivates us to think more deeply about the relationship between the SSVS and the Shang method, which we plan to study in our future research.

Table 1: Results of the posterior probabilities of all the possible models for different priors in blood lead level data.

| <i>Model</i> | <i>Shang</i>  | <i>NMIG</i>   | <i>Kuo&amp;Mallick</i> | SSVS          |               |               |               |
|--------------|---------------|---------------|------------------------|---------------|---------------|---------------|---------------|
|              |               |               |                        | $c = 1/10$    | $c = 1/100$   | $c = 1/1000$  | $c = 1/10000$ |
| $H_0$        | 0.0535        | 0.0000        | 0.0000                 | 0.0033        | 0.0000        | 0.0000        | 0.0000        |
| $H_1$        | 0.1890        | <b>0.3732</b> | <b>0.3997</b>          | <b>0.2962</b> | <b>0.3655</b> | 0.3740        | 0.3722        |
| $H_2$        | 0.1898        | 0.2648        | 0.2555                 | 0.2146        | 0.1950        | 0.1866        | 0.1764        |
| $H_3$        | 0.0584        | 0.0011        | 0.0019                 | 0.0173        | 0.0057        | 0.0024        | 0.0031        |
| $H_{12}$     | 0.1846        | 0.2373        | 0.1955                 | 0.2148        | 0.0754        | 0.0416        | 0.0390        |
| $H_{13}$     | 0.0633        | 0.0037        | 0.0052                 | 0.0186        | 0.0036        | 0.0015        | 0.0016        |
| $H_{23}$     | 0.0478        | 0.0000        | 0.0001                 | 0.0061        | 0.0001        | 0.0000        | 0.0000        |
| $H_F$        | <b>0.2136</b> | 0.1199        | 0.1421                 | 0.2290        | 0.3547        | <b>0.3939</b> | <b>0.4077</b> |

Table 2: Posterior means (mean), variances (SD) and 95% credible intervals (CrI) for blood lead level data.

| Mthodes                         |      | $\mu_1$       | $\sigma_\tau^2$ | $\sigma^2$  | $\delta_1$  | $\delta_2$  | $\delta_3$   |
|---------------------------------|------|---------------|-----------------|-------------|-------------|-------------|--------------|
| <i>Shang</i>                    | Mean | 23.535        | 25.424          | 6.217       | 0.546       | 0.507       | 1.362        |
|                                 | Var  | 1.266         | 32.463          | 1.278       | 0.836       | 0.654       | 1.289        |
|                                 | CrI  | (21.01,25.46) | (16.47,38.64)   | (4.66,8.87) | (0,3.01)    | (0,2.64)    | (0,3.53)     |
| <i>NMIG</i>                     | Mean | 23.676        | 25.612          | 5.57        | 0.287       | 0.41        | 1.748        |
|                                 | Var  | 0.615         | 31.941          | 0.430       | 0.159       | 0.221       | 0.239        |
|                                 | CrI  | (22.12,25.2)  | (16.67,38.6)    | (4.43,7)    | (0,1.3)     | (0,1.46)    | (0.75,2.66)  |
| <i>Kuo&amp;Mallick</i>          | Mean | 23.672        | 25.599          | 5.571       | 0.278       | 0.438       | 1.732        |
|                                 | Var  | 0.621         | 32.431          | 0.431       | 0.173       | 0.240       | 0.251        |
|                                 | CrI  | (22.1,25.21)  | (16.62,38.84)   | (4.43,7)    | (0,1.3)     | (0,1.48)    | (0.72,2.66)  |
| <i>SSVS</i><br>$c\phi_i = 1/10$ | Mean | 23.586        | 25.639          | 5.534       | 0.426       | 0.555       | 1.403        |
|                                 | Var  | 0.589         | 32.722          | 0.424       | 0.091       | 0.124       | 0.194        |
|                                 | CrI  | (22.06,25.08) | (16.67,38.94)   | (4.41,6.95) | (0.02,1.16) | (0.04,1.35) | (0.46,2.22)  |
| <i>SSVS</i><br>$c = 1/100$      | Mean | 23.618        | 25.625          | 5.548       | 0.368       | 0.562       | 1.435        |
|                                 | Var  | 0.602         | 32.595          | 0.428       | 0.129       | 0.177       | 0.195        |
|                                 | CrI  | (22.08,25.14) | (16.76,38.94)   | (4.41,6.97) | (0.01,1.22) | (0.02,1.42) | (0.53,2.26)  |
| <i>SSVS</i><br>$c = 1/1000$     | Mean | 23.624        | 25.621          | 5.55        | 0.356       | 0.579       | 1.433        |
|                                 | Var  | 0.6           | 32.434          | 0.426       | 0.148       | 0.192       | 0.187        |
|                                 | CrI  | (22.1,25.14)  | (16.68,38.79)   | (4.42,6.97) | (0,1.24)    | (0.01,1.44) | (0.57,2.27)  |
| <i>SSVS</i><br>$c = 1/10000$    | Mean | 23.616        | 25.619          | 5.553       | 0.35        | 0.585       | 1.431        |
|                                 | Var  | 0.607         | 32.616          | 0.427       | 0.152       | 0.195       | 0.189        |
|                                 | CrI  | (22.07,25.14) | (16.65,38.93)   | (4.41,6.97) | (0,1.24)    | (0,1.45)    | (0.564,2.26) |

Table 3: The difference between the posterior probabilities of the top two models selected by SSVS

| <i>Model</i> | <i>Shang</i> | <i>NMIG</i> | <i>Kuo&amp;Mallick</i> | SSVS       |             |              |               |
|--------------|--------------|-------------|------------------------|------------|-------------|--------------|---------------|
|              |              |             |                        | $c = 1/10$ | $c = 1/100$ | $c = 1/1000$ | $c = 1/10000$ |
| $H_1$        | 0.1890       | 0.3732      | 0.3997                 | 0.2962     | 0.3655      | 0.3740       | 0.3722        |
| $H_F$        | 0.2136       | 0.1199      | 0.1421                 | 0.2290     | 0.3547      | 0.3939       | 0.4077        |
| difference   | -0.0246      | 0.2533      | 0.2576                 | 0.0672     | 0.0108      | -0.0199      | -0.0355       |

Table 4: Results of the posterior probabilities of all the possible models for different priors in blood lead level data.

| <i>Model</i> | Posterior prob   |                   |                   |                    |                  |                     |
|--------------|------------------|-------------------|-------------------|--------------------|------------------|---------------------|
|              | $c\phi_i = 1/10$ | $c\phi_i = 1/100$ | $c\phi_i = 1/500$ | $c\phi_i = 1/1000$ | $c\phi_i = 5000$ | $c\phi_i = 1/10000$ |
| $H_0$        | 0.0033           | 0.0000            | 0.0000            | 0.0000             | 0.0000           | 0.0000              |
| $H_1$        | <b>0.2962</b>    | <b>0.3655</b>     | 0.3635            | 0.3740             | 0.3606           | 0.3722              |
| $H_2$        | 0.2146           | 0.1950            | 0.1847            | 0.1866             | 0.1860           | 0.1764              |
| $H_3$        | 0.0173           | 0.0057            | 0.0037            | 0.0024             | 0.0028           | 0.0031              |
| $H_{12}$     | 0.2148           | 0.0754            | 0.0495            | 0.0416             | 0.0337           | 0.0390              |
| $H_{13}$     | 0.0186           | 0.0036            | 0.0013            | 0.0015             | 0.0027           | 0.0016              |
| $H_{23}$     | 0.0061           | 0.0001            | 0.0000            | 0.0000             | 0.0003           | 0.0000              |
| $H_F$        | 0.2290           | 0.3547            | <b>0.3973</b>     | <b>0.3939</b>      | <b>0.4140</b>    | <b>0.4077</b>       |

## References

George, E. L., McCulloch, R. E., 1993. Variable selection via Gibbs sampling. *Journal of the American Statistical Association* 88, 881C889.

Walli, G. M., Wagner, H., 2011. Comparing spike and slab priors for bayesian variable selection. *Austrian Journal of Statistics* 40, 241C264.
